# Supplementary material
Source: PubMed Central journal article supplement (PMC4787678)

Funnel plot of (A) eGFR <60 ml/min/1.73m<sup>2</sup> vs. reference (B) eGFR 60-90 ml/min/1.73m<sup>2</sup> vs. reference. RR: relative risk, SE: standard error. Figure B suggests a small degree of publication bias, with a slight underrepresentation of small studies showing neutral or unexpected protective effects.

(A)

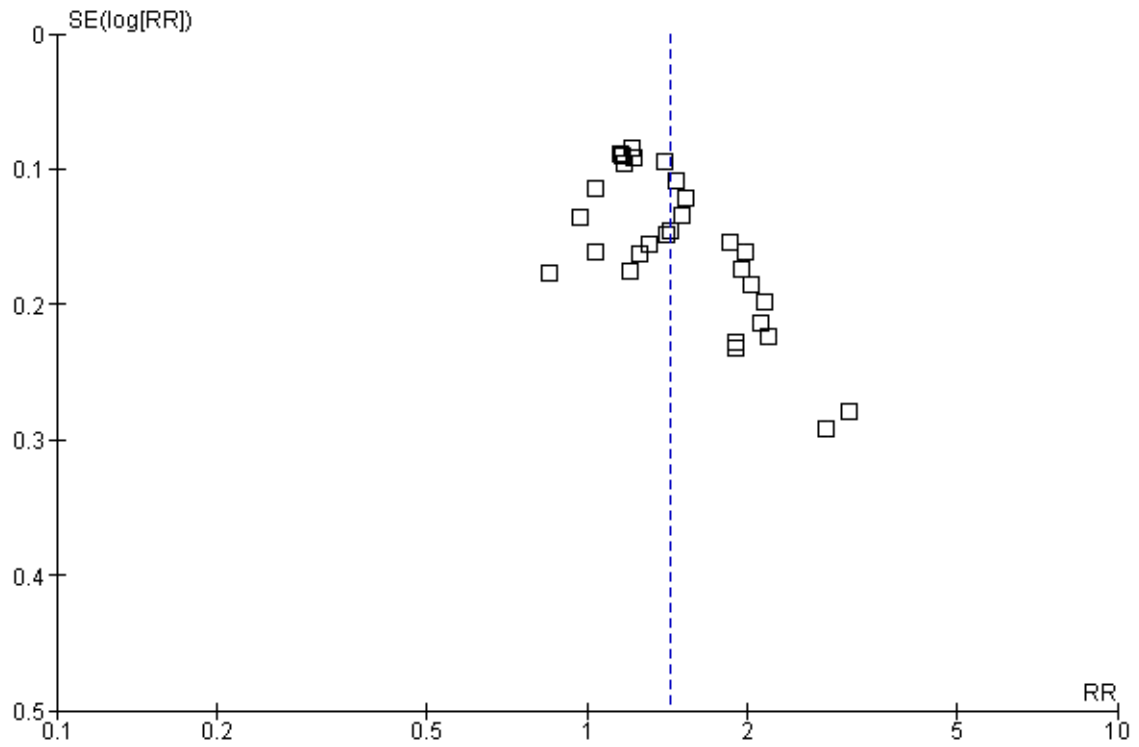

(B)

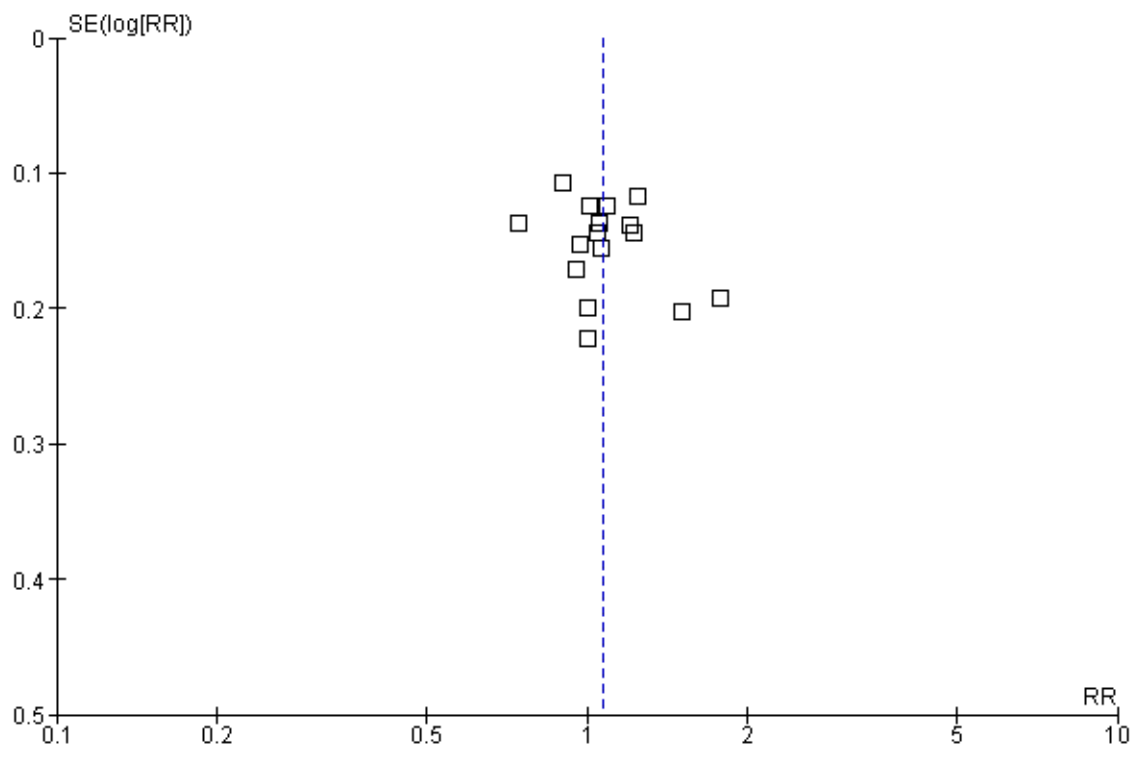

Supplement: leem753731.wf1_default.pdf [file leem753731.wf1_default.pdf]
